# Supplementary material
Source: publisher site journal article supplement (https://www.spandidos-publications.com/2154/downloadSupplementary)
Supplement: Supplementary file 1 [file downloadSupplementary]

## Sheet: Table SI
Table SI.The primer information of miRNAs for real-time quantitative PCR (qPCR) verification.
miRNA Base ID	Sequence (5' to 3')
hsa-miR-8055-RT	GTCGTATCCAGTGCAGGGTCCGAGGTATTCGCACTGGATACGACTCCGTC
hsa-miR-8055-F	CTTTGAGCACATGAGCAGA
hsa-miR-548aw-RT	GTCGTATCCAGTGCAGGGTCCGAGGTATTCGCACTGGATACGACAACCGT
hsa-miR-548aw-F	GTGCAAAAGTCATCAC
hsa-miR-3928-5p-RT	GTCGTATCCAGTGCAGGGTCCGAGGTATTCGCACTGGATACGACGCAGGC
hsa-miR-3928-5p-F	TGAAGCTCTAAGGTTCCGC
hsa-miR-323a-5p-RT	GTCGTATCCAGTGCAGGGTCCGAGGTATTCGCACTGGATACGACGCGAAC
hsa-miR-323a-5p-F	AGGTGGTCCGTGGCGCGT
hsa-miR-4788-RT	GTCGTATCCAGTGCAGGGTCCGAGGTATTCGCACTGGATACGACGCCTCC
hsa-miR-4788-F	TTACGGACCAGCTAAGG
hsa-miR-378g-RT	GTCGTATCCAGTGCAGGGTCCGAGGTATTCGCACTGGATACGACCTTCTG
hsa-miR-378g-F	ACTGGGCTTGGAGTCA
hsa-miR-422a-RT	GTCGTATCCAGTGCAGGGTCCGAGGTATTCGCACTGGATACGACGCCTTC
hsa-miR-422a-F	ACTGGACTTAGGGTCAG
hsa-miR-1237-3p-RT	GTCGTATCCAGTGCAGGGTCCGAGGTATTCGCACTGGATACGACCTGGGG
hsa-miR-1237-3p-F	TCCTTCTGCTCCGTC
hsa-miR-4297-RT	GTCGTATCCAGTGCAGGGTCCGAGGTATTCGCACTGGATACGACCACAGA
hsa-miR-4297-F	TGCCTTCCTGTC
hsa-miR-3687-RT	GTCGTATCCAGTGCAGGGTCCGAGGTATTCGCACTGGATACGACACGTCG
hsa-miR-3687-F	CCCGGACAGGCGTTCGTG
